# Supplementary material for: Clarification of photocatalysis induced by iron ion species naturally contained in a clay compound
Source: Royal Society of Chemistry journal article supplement (doi:10.1039/c1cy00286d), 2011-01-01
Supplement: c1cy00286d.pdf [file c1cy00286d.pdf]

## Electronic supplementary information

### Clarification of photocatalysis induced by iron ion species naturally contained in a clay compound

Seiji Kakuta,<sup>a\*</sup> Toru Okayama,<sup>a</sup> Megumi Kato,<sup>b</sup> Akihiro Oda,<sup>b</sup> and Toshiyuki Abe<sup>c\*</sup>

<sup>a</sup> New Energy Technology Section, Aomori Prefectural Industrial Technology Research Center, 221-10, Yamaguchi, Nogi, Aomori 030-0142, Japan.

<sup>b</sup> Nihon Kohken Inc., 9-2, Hyoganzawa Fukuro, Kuroishi 036-0412, Japan.

<sup>c</sup> Department of Frontier Materials Chemistry, Graduate School of Science and Technology, Hirosaki University, 3 Bunkyo-cho, Hirosaki 036-8561, Japan.

\* Corresponding author

#### Characterization of Fe(III)MMT after an additional hydrogen peroxide treatment

After the preparation of Fe(III)MMT through Method A, it was additionally treated with 15% hydrogen peroxide solution. 71 cm<sup>3</sup> of 36% hydrogen peroxide (Kanto Chemical Co., Inc.) was dropped into a 100 cm<sup>3</sup> suspension of 1 wt% Fe(III)MMT with stirring, following which the mixture was continuously stirred for 3 h at room temperature. The product was washed with deionized water and dried at 100°C under air. The structural characteristics of the resulting sample were identified in terms of IR spectrum (Fig. S1).

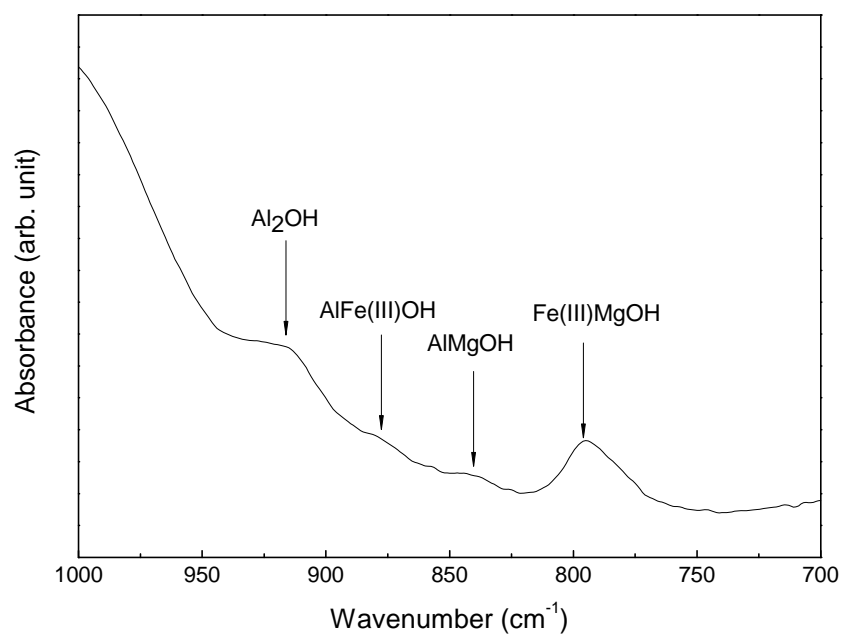

**Fig. S1.** The IR spectrum of Fe(III)MMT after additional treatment by 15% H<sub>2</sub>O<sub>2</sub>. The arrows indicate the peak positions of the species originating from structural-Fe(III) species.

## Characterization of B-MMT

B-MMT was prepared through the acid treatment of Fe(III)MMT (Method B), where the amount of HFO was varied with the concentration of HCl (Table S1).

**Table S1** The amount of HFO in 20mg B-MMT with the function of the HCl concentration.

| HCl concentration<br>in acid treatment (mol dm <sup>-3</sup> ) | The amount of HFO (µg) |
|----------------------------------------------------------------|------------------------|
| 0.3                                                            | 89                     |
| 1.0                                                            | 116                    |
| 2.0                                                            | 154                    |
| 3.0                                                            | 175                    |

The structural and optical characteristics of B-MMT were identified in terms of IR spectrum (Fig. S2), XRD pattern (Fig. S3), and diffuse reflectance spectrum (Fig. S4).

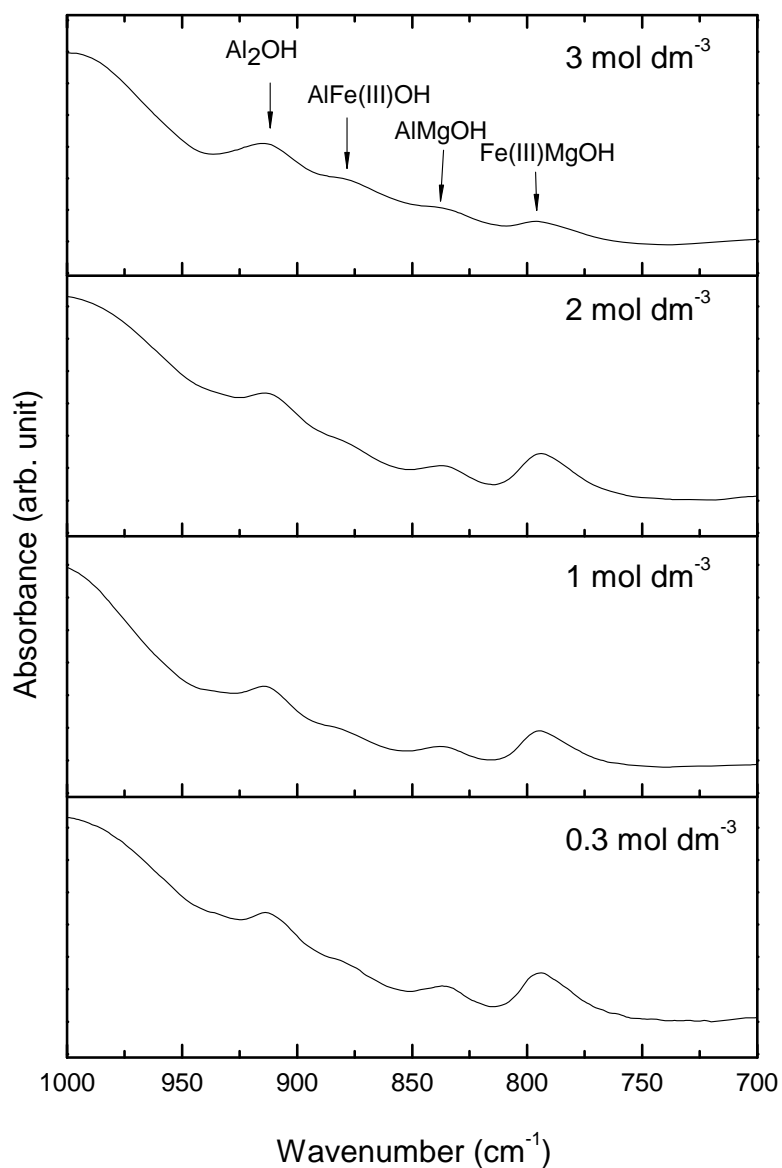

**Fig. S2.** The IR spectra of B-MMT with the changes in the concentration of HCl. The arrows indicate the peak positions of the species originating from structural-Fe(III) species.

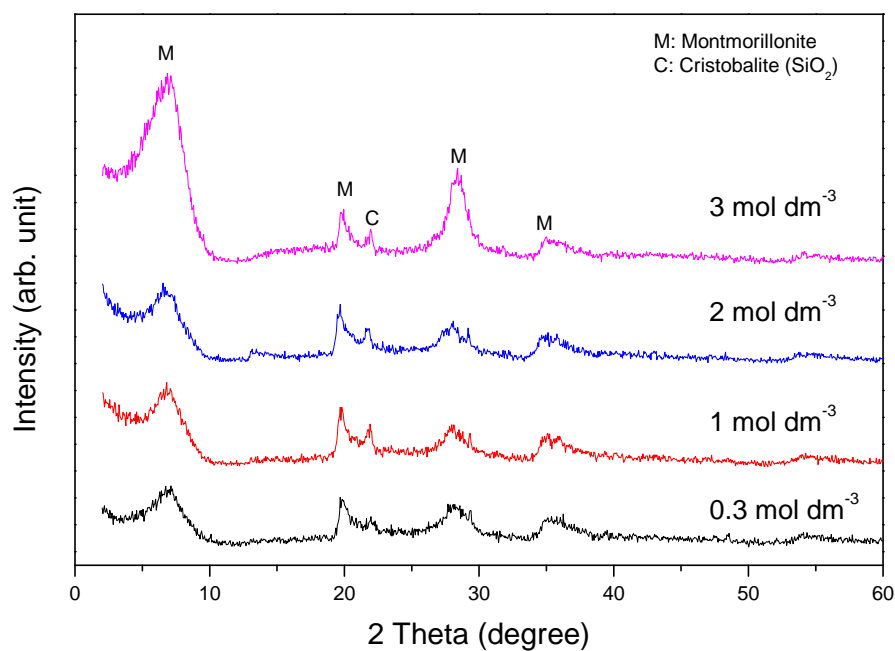

**Fig. S3.** The XRD patterns of B-MMT with the changes in the concentration of HCl.

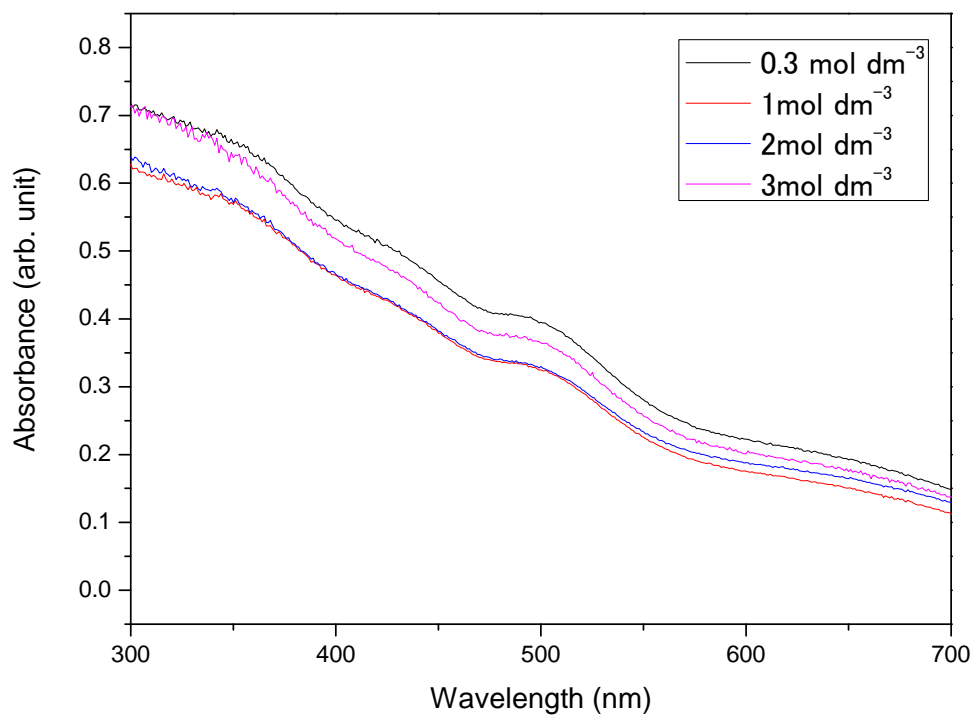

**Fig. S4.** The diffuse reflectance spectra of B-MMT with the changes in the concentration of HCl.

### The stability of Fe(III)MMT

Fe(III)MMT was used repeatedly as the photocatalyst for acetic acid degradation; the acetic acid solution was replaced through centrifugation after every irradiation for 10 h. After each cycle, the amount of CO<sub>2</sub> evolved was measured (TableS2).

Table S2 The amount of CO<sub>2</sub> evolved after 10 hours of irradiation in repeatedly using Fe(III)MMT as the photocatalyst for the degradation of acetic acid.<sup>a</sup>

|       | The amount of CO <sub>2</sub> / μmol |
|-------|--------------------------------------|
| run 1 | 13.2                                 |
| run 2 | 14.1                                 |
| run 3 | 13.4                                 |

<sup>a</sup> Concentration of acetic acid: 1 mol dm<sup>-3</sup> (pH 5); light intensity: 110 mW cm<sup>-2</sup>.

### The equations in the photo-Kolbe reaction<sup>1-3</sup>

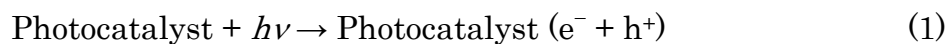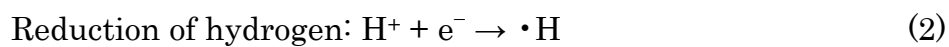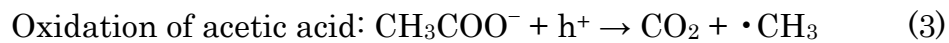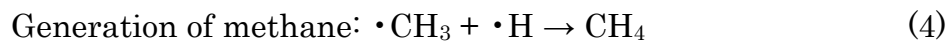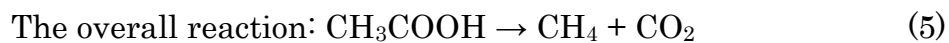

### References

1. B. Kraeutler and A. J. Bard, *J. Am. Chem. Soc.*, 1978, **100**, 2239-2240.
2. B. Kraeutler and A. J. Bard, *J. Am. Chem. Soc.*, 1978, **100**, 5985-5992.
3. T. Sakata, T. Kawai and K. Hashimoto, *J. Phys. Chem.*, 1984, **88**, 2344-2350.
